# Supplementary material for: Modelling the Gut Fungal-Community in TIM-2 with a Microbiota from Healthy Individuals
Source: MDPI journal article supplement (doi:10.3390/jof9010104), 2023-01-12
Supplement: s1 [file s1]

## Supplemental material

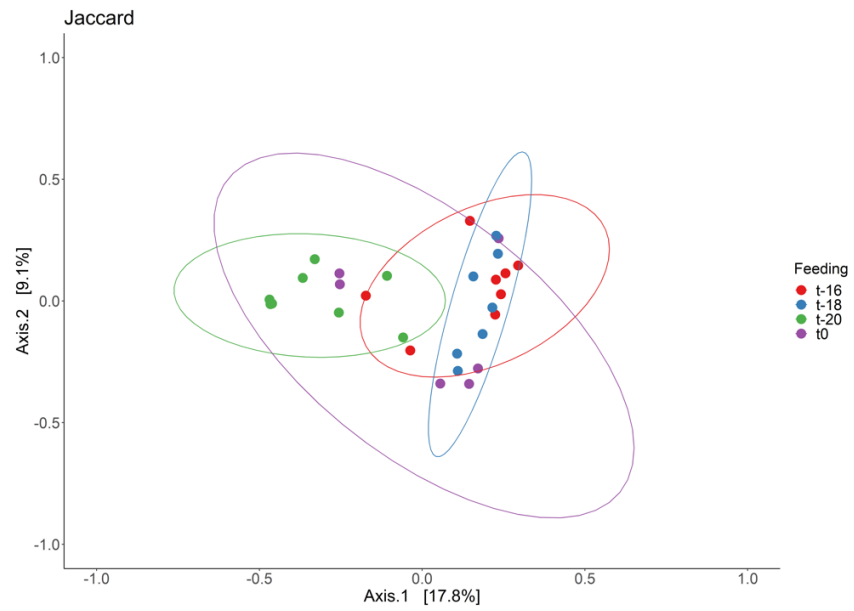

(a)

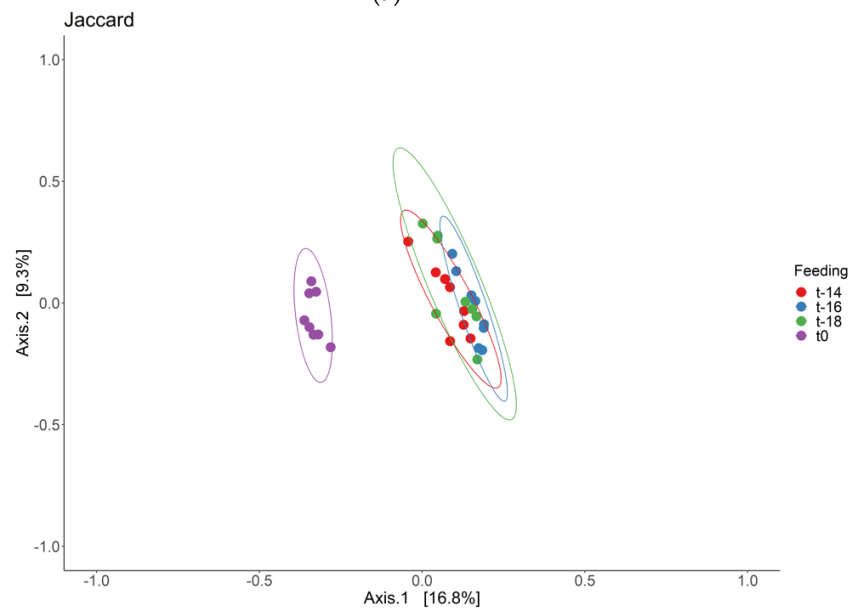

(b)

**Figure S1:** Beta-diversity during the adaption period visualized using PCoA plot with Jaccard similarities; (a) Fungi; (b) Bacteria. N=8

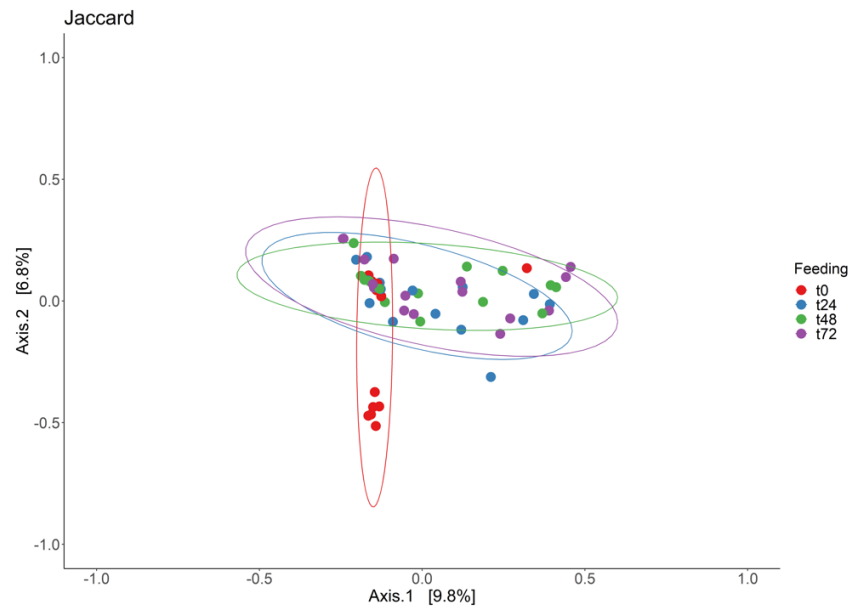

(a)

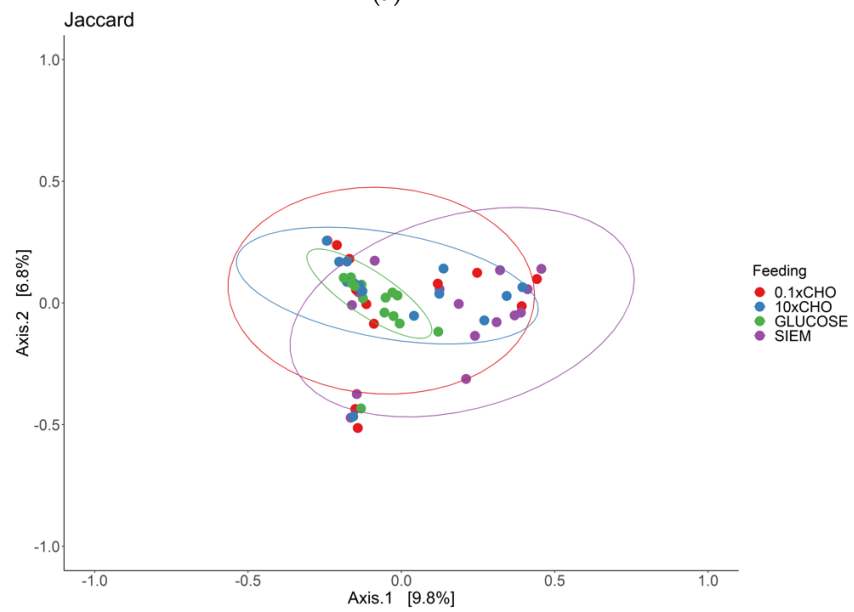

(b)

**Figure S2:** Beta-diversity of the fungal community during the intervention period visualized using PCoA plot with Jaccard similarities; (a) Between time points for all feeding interventions; (b) Between feeding interventions for the time points t24, t48 and t72.

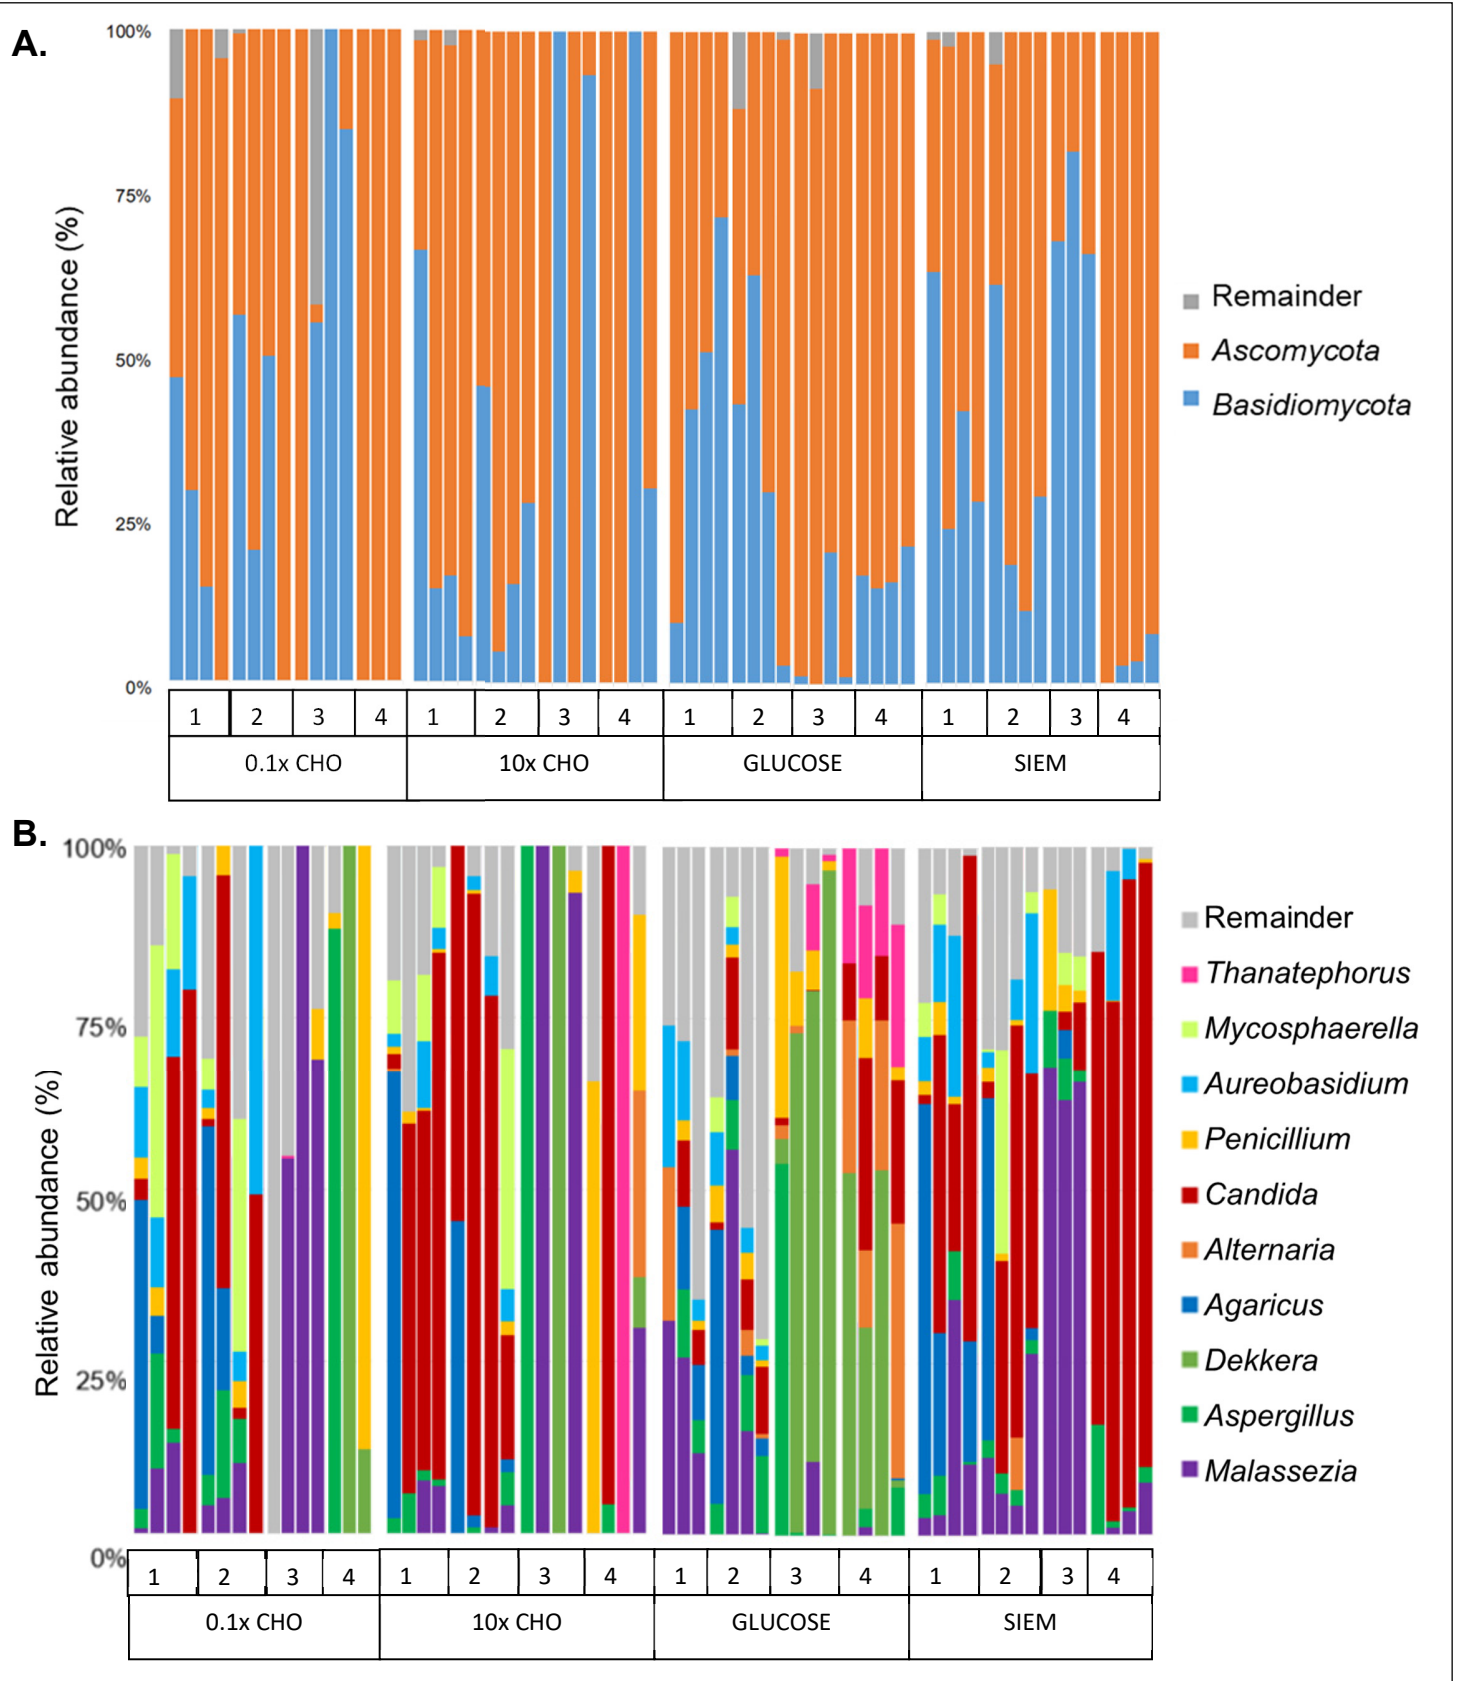

**Figure S3:** Relative abundance (%) of major groups of fungi during the test period after inoculation in TIM-2; (a) Phyla; (b) Genera; 1,2,3,4 stand for different replicates.

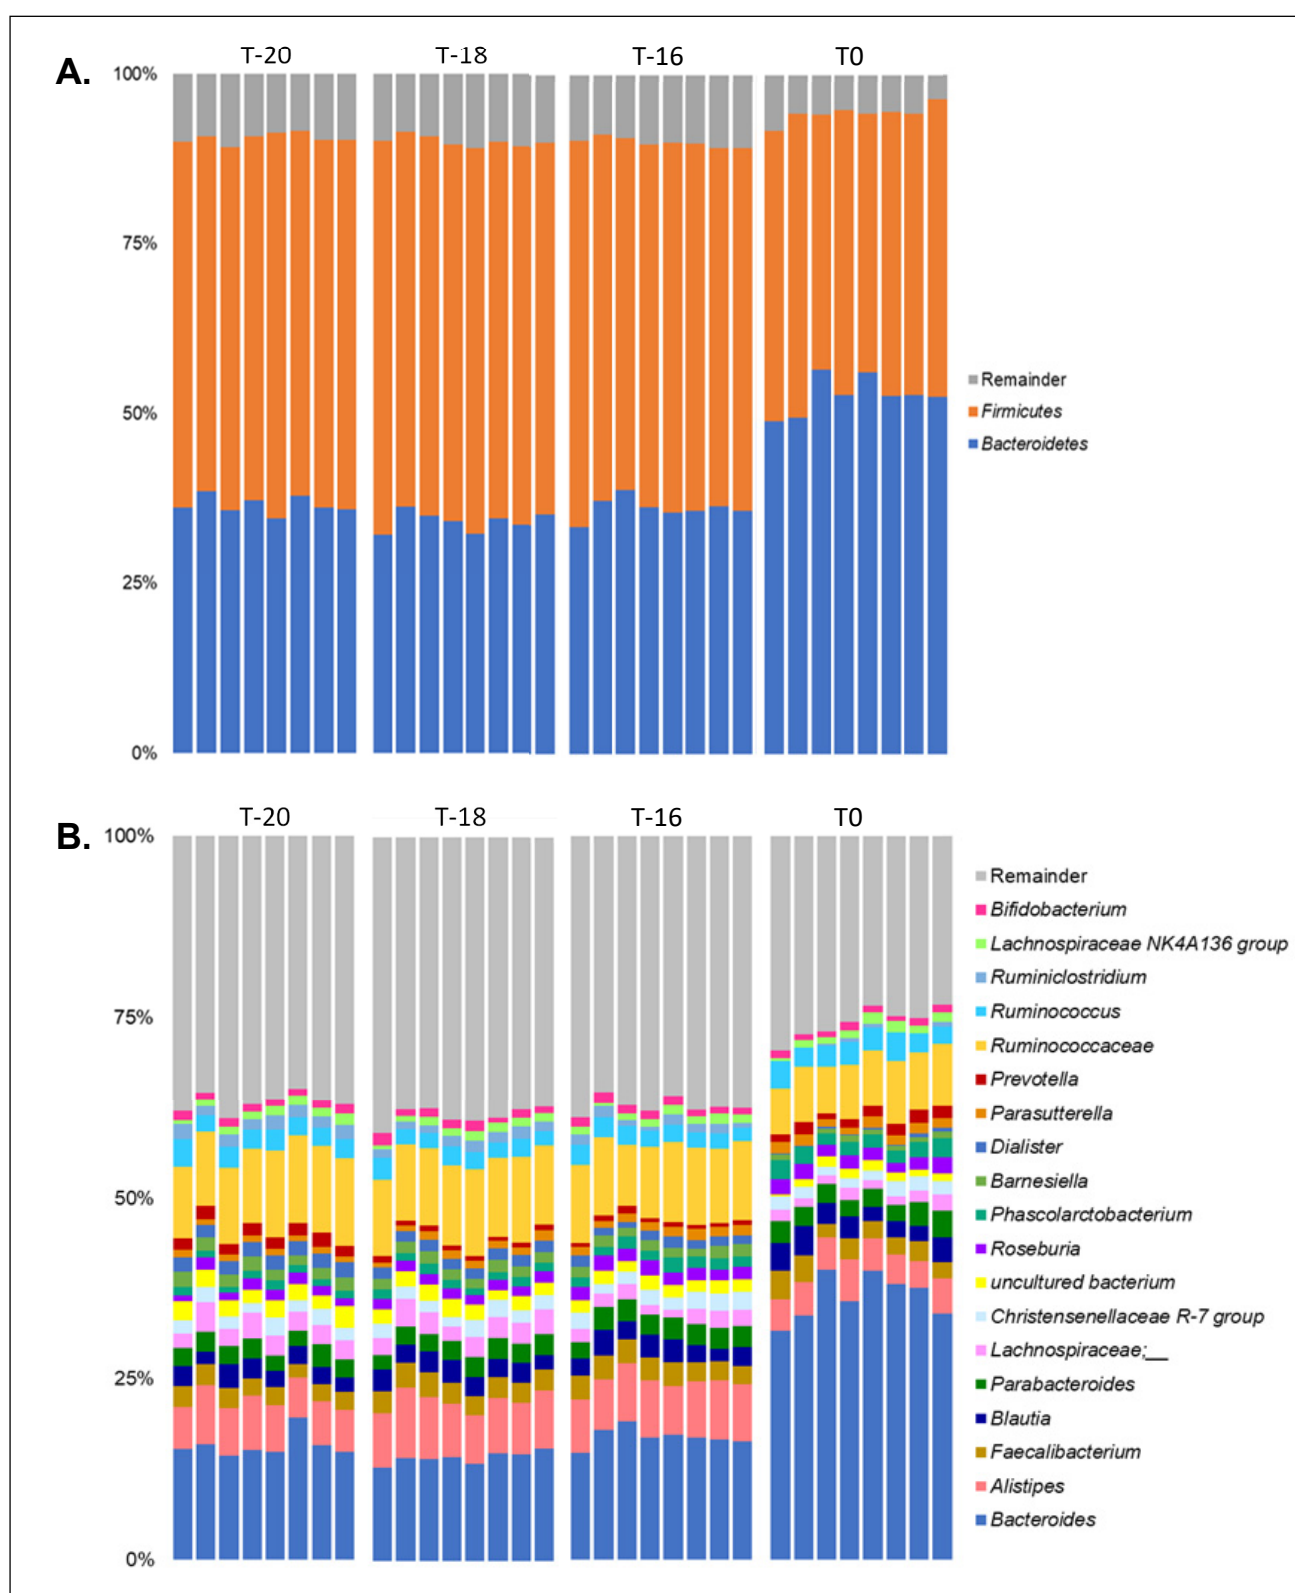

**Figure S4:** Relative abundance (%) of major groups of bacteria during the adaptation period after inoculation in TIM-2; (a) Phyla; (b) Genera.

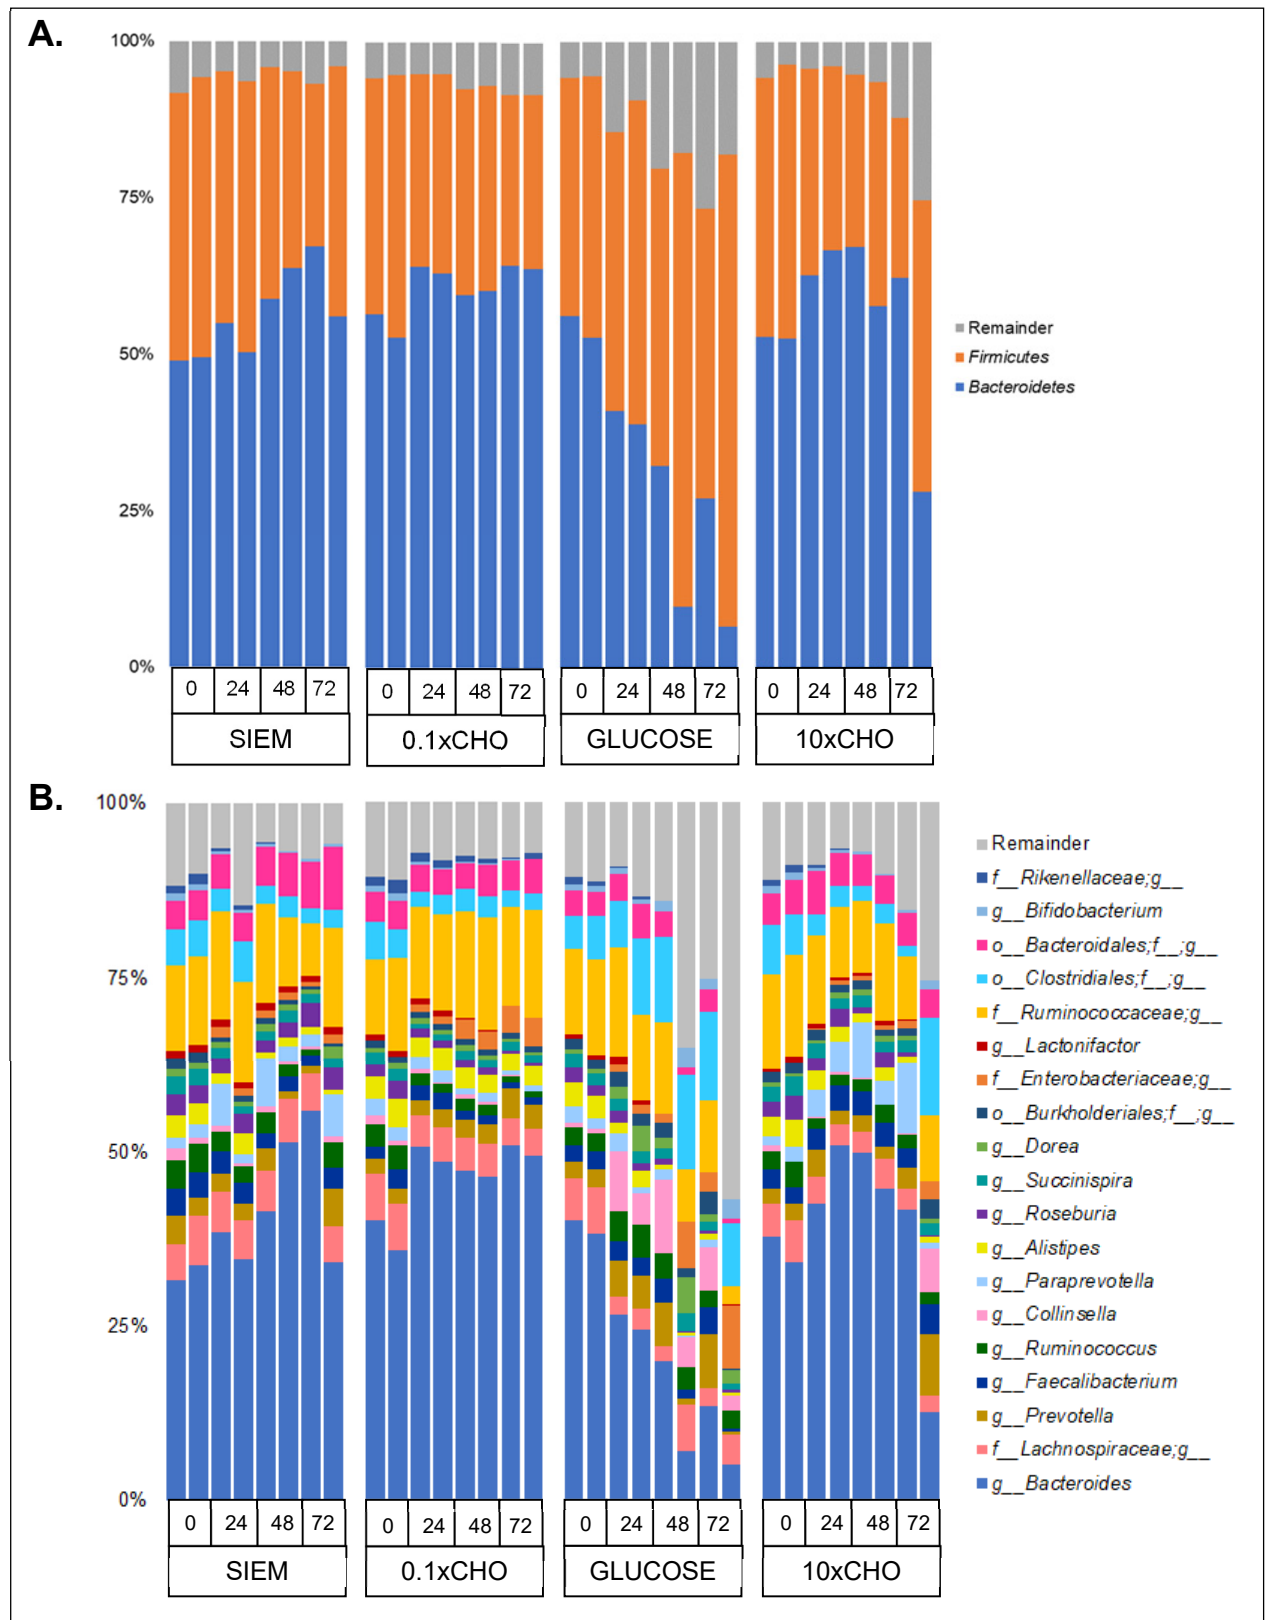

**Figure S5:** Relative abundance (%) of major groups of bacteria during the test period after inoculation in TIM-2; (a) Phyla; (b) Genera
